# Supplementary material
Source: ML conference proceedings conference paper supplement (https://proceedings.mlr.press/v216/wang23g.html)
Supplement: Supplementary file 1 [file wang23g-supp.pdf]

---

# On the Role of Generalization in Transferability of Adversarial Examples (Supplementary Material)

---

Yilin Wang<sup>1</sup>

Farzan Farnia<sup>1</sup>

<sup>1</sup> Department of Computer Science and Engineering,  
The Chinese University of Hong Kong,  
Hong Kong SAR

## A PROOFS

### A.1 PROOF OF PROPOSITION 1

To prove the proposition, note that the optimization problem for  $\lambda$ -optimal adversarial attack scheme can be written as

$$\max_{\delta: \mathcal{X} \times \mathcal{Y} \rightarrow \mathbb{R}^d} \mathbb{E} \left[ \ell(h_{\mathbf{w}}(\mathbf{X} + \delta(\mathbf{X}, Y)), Y) - \frac{\lambda}{2} \|\delta(\mathbf{X}, Y)\|^2 \right].$$

We observe that the above optimization problem decouples into separate problems for every  $(\mathbf{x}, y)$ , and hence  $\delta^*(\mathbf{x}, y)$  is the optimal solution to the following optimization problem

$$\max_{\delta \in \mathbb{R}^d} \ell(h_{\mathbf{w}}(\mathbf{x} + \delta), y) - \frac{\lambda}{2} \|\delta\|^2.$$

Since  $\ell \circ h_{\mathbf{w}}$  is assumed to be  $\lambda$ -smooth in  $\mathbf{x}$ , the objective function in the above optimization problem is a concave function of  $\delta$ . This is because the Hessian of the above objective function will be negative semi-definite as

$$\nabla_{\delta}^2 \left[ \ell(h_{\mathbf{w}}(\mathbf{x} + \delta), y) - \frac{\lambda}{2} \|\delta\|^2 \right] = \nabla_{\delta}^2 \ell(h_{\mathbf{w}}(\mathbf{x} + \delta), y) - \lambda I_{d \times d} \preceq \mathbf{0}. \quad (1)$$

Therefore, applying the first-order necessary condition implies that a globally optimal solution  $\delta^*(\mathbf{x}, y)$  to the above concave objective function will be the solution to

$$\nabla_{\mathbf{x}} \ell(h_{\mathbf{w}}(\mathbf{x} + \delta^*(\mathbf{x}, y)), y) - \lambda \delta^*(\mathbf{x}, y) = \mathbf{0}.$$

The above necessary and sufficient condition for  $\delta^*(\mathbf{x}, y)$  can be rewritten as:

$$(\mathbf{x} + \delta^*(\mathbf{x}, y)) - \frac{1}{\lambda} \nabla_{\mathbf{x}} \ell(h_{\mathbf{w}}(\mathbf{x} + \delta^*(\mathbf{x}, y)), y) = \mathbf{x}.$$

Note that this condition is equivalent to the following equation which completes the proof:

$$\delta^*(\mathbf{x}, y) = \left( \text{Id}_{\mathbf{x}} - \frac{1}{\lambda} \nabla_{\mathbf{x}} \ell \circ h_{\mathbf{w}} \right)^{-1} (\mathbf{x}) - \mathbf{x}.$$

### A.2 PROOF OF THEOREM 1

**Assumption 1.** Loss function  $\ell(y, y')$  is a  $c$ -bounded, 1-Lipschitz, and 1-smooth function of the input  $y$ , i.e. for every  $y_1, y_2, y' \in \mathcal{Y}$  we have  $|\ell(y_1, y')| \leq c$ ,  $|\ell(y_1, y') - \ell(y_2, y')| \leq \|y_1 - y_2\|_2$ , and  $\|\nabla_y \ell(y_1, y') - \nabla_y \ell(y_2, y')\|_2 \leq \|y_1 - y_2\|_2$ .

**Assumption 2.** The set of substitute DNNs in the black-box attack scheme  $\mathcal{H}_{\mathcal{W}} = \{h_{\mathbf{w}} : \mathbf{w} \in \mathcal{W}\}$  contains  $L$ -layer neural networks  $h_{\mathbf{w}}(\mathbf{x}) = W_L \phi_L(W_{L-1} \phi_{L-1}(\cdots W_1 \phi_1(W_0 \mathbf{x} \cdot))$ . We suppose that the dimensions of matrices  $W_0, \dots, W_k$  is bounded by  $D$ , and assume every activation  $\phi_i$  satisfies  $\phi_i(0) = 0$  and is  $\gamma_i$ -Lipschitz and  $\gamma_i$ -smooth, i.e.  $\max\{|\phi'_i(z)|, |\phi''_i(z)|\} \leq \gamma_i$  holds for every  $z \in \mathbb{R}$ .

**Assumption 3.** The class of target classifiers  $\mathcal{F}_{\mathcal{V}} = \{f_{\mathbf{v}} : \mathbf{v} \in \mathcal{V}\}$  consists of  $K$ -layer neural network functions  $f_{\mathbf{v}}(\mathbf{x}) = V_K \psi_L(V_{L-1} \psi_{L-1}(\cdots V_1 \psi_1(V_0 \mathbf{x} \cdot))$  with activation function  $\psi_i$ 's. We suppose that the dimensions of matrices  $V_0, \dots, V_k$  is bounded by  $D$ . Also, we assume every  $\psi_i$  satisfies  $\psi_i(0) = 0$  and is  $\xi_i$ -Lipschitz, i.e.  $\max_z |\psi'_i(z)| \leq \xi_i$ . Also, we define the capacity  $R_{\mathcal{V}}$  as

$$R_{\mathcal{V}} := \sup_{\mathbf{v} \in \mathcal{V}} \left\{ \left( \prod_{i=0}^K \xi_i \|V_i\|_2 \right) \left( \sum_{i=0}^K \frac{\|V_i^\top\|_{2,1}^{2/3}}{\|V_i\|_2^{2/3}} \right)^{3/2} \right\}.$$

To show Theorem 1, we first present the following lemmas.

**Lemma 1** ([Farnia et al., 2018], Lemma 7). Under Assumptions 1, 2, the substitute neural network's loss function  $\ell(h_{\mathbf{w}}(\mathbf{x}), y)$  is  $\kappa$ -smooth in input vector  $\mathbf{x}$ , i.e its gradient with respect to  $\mathbf{x}$  is  $\kappa$ -Lipschitz and satisfies

$$\forall \mathbf{x}, \mathbf{x}' \in \mathcal{X}, y \in \mathcal{Y} : \quad \|\nabla_{\mathbf{x}} \ell(h_{\mathbf{w}}(\mathbf{x}), y) - \nabla_{\mathbf{x}} \ell(h_{\mathbf{w}}(\mathbf{x}'), y)\| \leq \kappa \|\mathbf{x} - \mathbf{x}'\|,$$

where  $\kappa = \left( \sum_{i=0}^L \prod_{j=0}^i \gamma_j \|W_j\| \right) \left( \prod_{i=0}^L \gamma_i \|W_i\| \right)$ .

**Lemma 2.** Under Theorem 1's assumptions, the  $\lambda$ -optimal attack scheme  $\delta_{\mathbf{w}}^* : \mathcal{X} \times \mathcal{Y} \rightarrow \mathbb{R}^d$  satisfies the following output norm constraint for every  $(\mathbf{x}, y) \in \mathcal{X} \times \mathcal{Y}$ :

$$\|\delta_{\mathbf{w}}^*(\mathbf{x}, y)\| \leq \frac{\prod_{i=0}^L \gamma_i \|W_i\|_2}{\lambda} = \frac{L_{\mathbf{w}}}{\lambda}.$$

*Proof.* Note that since  $\lambda > \left( \sum_{i=0}^L \prod_{j=0}^i \gamma_j \|W_j\| \right) \prod_{i=0}^L \gamma_i \|W_i\|_2$  holds according to Theorem 1's assumptions, the smoothness condition of Proposition ?? will hold according to Lemma 1. As a result, we have

$$\delta_{\mathbf{w}}^*(\mathbf{x}, y) = \frac{1}{\lambda} \nabla_{\mathbf{x}} \ell(h_{\mathbf{w}}(\mathbf{x} + \delta_{\mathbf{w}}^*(\mathbf{x}, y)), y).$$

Therefore,

$$\|\delta_{\mathbf{w}}^*(\mathbf{x}, y)\| \leq \frac{\|\nabla_{\mathbf{x}} \ell(h_{\mathbf{w}}(\mathbf{x} + \delta_{\mathbf{w}}^*(\mathbf{x}, y)), y)\|}{\lambda} \leq \frac{\prod_{i=0}^L \gamma_i \|W_i\|_2}{\lambda}.$$

The final inequality follows from the Lipschitz coefficient of DNN function  $h_{\mathbf{w}}$  which is the composition of linear transformation  $W_i$ 's (with Lipschitz constant  $\|W_i\|_2$ ) and activation non-linearity  $\phi_i$ 's (with Lipschitz constant  $\gamma_i$ ). Therefore, the proof is complete.  $\square$

**Lemma 3.** Under Assumption 2, the substitute neural network  $h_{\mathbf{w}}$ 's gradient satisfies the following error bound under a perturbation matrix  $\Delta_k$  with  $L_2$ -operator norm  $\|\Delta_k\|_2 \leq t$  to wight matrix  $W_k$ , where we define  $\tilde{\mathbf{w}} = \text{vec}(W_0, \dots, W_{k-1}, W_k + \Delta_k, W_{k+1}, \dots, W_L)$ :

$$\|\nabla_{\mathbf{x}} h_{\mathbf{w}}(\mathbf{x}) - \nabla_{\mathbf{x}} h_{\tilde{\mathbf{w}}}(\mathbf{x})\| \leq \frac{L_{\mathbf{w}} \sum_{i=k}^L \prod_{j=0}^i \gamma_j \|W_j\|}{\|W_k\|_2} \|\Delta_k\|_2$$

*Proof.* Note that the neural network's Jacobian with respect to the input follows from:

$$\mathbf{J}_{h_{\mathbf{w}}}(\mathbf{x}) = \prod_{i=0}^L W_i^\top \text{diag}(\phi'_i(h_{\mathbf{w}_{0:i}}(\mathbf{x}))).$$

In the above,  $h_{\mathbf{w}_{0:i}}(\mathbf{x})$  denotes the neural net's output at layer  $i$ . Therefore, for  $\tilde{\mathbf{w}}$  which is different from  $\mathbf{w}$  only at layer  $k$  we will have:

$$\|\mathbf{J}_{h_{\mathbf{w}}}(\mathbf{x}) - \mathbf{J}_{h_{\tilde{\mathbf{w}}}}(\mathbf{x})\|_2 \leq \sum_{i=k}^L \left[ \left( \prod_{j=0}^i \gamma_j \|W_j\|_2 \right) \left( \prod_{j=0}^i \gamma_j \|W_j\|_2 \right) \right] \frac{\|\Delta_k\|_2}{\|W_k\|_2}$$

$$\begin{aligned}
&= \left( \prod_{j=0}^L \gamma_j \|W_j\|_2 \right) \sum_{i=k}^L \left[ \prod_{j=0}^i \gamma_j \|W_j\|_2 \right] \frac{\|\Delta_k\|_2}{\|W_k\|_2} \\
&= \frac{L_{\mathbf{w}} \sum_{i=k}^L \prod_{j=0}^i \gamma_j \|W_j\|_2}{\|W_k\|_2} \|\Delta_k\|_2.
\end{aligned}$$

The proof is hence finished.  $\square$

**Lemma 4.** *Under Theorem 1's assumptions, the  $\lambda$ -optimal attack scheme  $\delta_{\mathbf{w}}^* : \mathcal{X} \times \mathcal{Y} \rightarrow \mathbb{R}^d$  satisfies the following error bound under a norm-bounded perturbation  $\Delta_k : \|\Delta_k\|_2 \leq t$ : to wight matrix  $W_k$  where we define  $\tilde{\mathbf{w}} = \text{vec}(W_0, \dots, W_{k-1}, W_k + \Delta_k, W_{k+1}, \dots, W_L)$ :*

$$\|\delta_{\mathbf{w}}^*(\mathbf{x}, y) - \delta_{\tilde{\mathbf{w}}}^*(\mathbf{x}, y)\| \leq \frac{L_{\mathbf{w}} \sum_{i=k}^L \prod_{j=0}^i \gamma_j \|W_j\|_2}{\tau \lambda \|W_k\|_2} \|\Delta_k\|_2$$

*Proof.* Since  $\lambda > \left( \sum_{i=0}^L \prod_{j=0}^i \gamma_j \|W_j\|_2 \right) \prod_{i=0}^L \gamma_i \|W_i\|_2$  follows from Theorem 1's assumption, Proposition ?? will hold according to Lemma 1 and implies that

$$\delta_{\mathbf{w}}^*(\mathbf{x}, y) = \frac{1}{\lambda} \nabla_{\mathbf{x}} \ell(h_{\mathbf{w}}(\mathbf{x} + \delta_{\mathbf{w}}^*(\mathbf{x}, y)), y).$$

As a result,

$$\begin{aligned}
&\|\delta_{\mathbf{w}}^*(\mathbf{x}, y) - \delta_{\tilde{\mathbf{w}}}^*(\mathbf{x}, y)\| \\
&= \frac{1}{\lambda} \left\| \nabla_{\mathbf{x}} \ell(h_{\mathbf{w}}(\mathbf{x} + \delta_{\mathbf{w}}^*(\mathbf{x}, y)), y) - \nabla_{\mathbf{x}} \ell(h_{\tilde{\mathbf{w}}}(\mathbf{x} + \delta_{\tilde{\mathbf{w}}}^*(\mathbf{x}, y)), y) \right\| \\
&\leq \frac{1}{\lambda} \left\| \nabla_{\mathbf{x}} \ell(h_{\mathbf{w}}(\mathbf{x} + \delta_{\mathbf{w}}^*(\mathbf{x}, y)), y) - \nabla_{\mathbf{x}} \ell(h_{\mathbf{w}}(\mathbf{x} + \delta_{\tilde{\mathbf{w}}}^*(\mathbf{x}, y)), y) \right\| \\
&\quad + \frac{1}{\lambda} \left\| \nabla_{\mathbf{x}} \ell(h_{\mathbf{w}}(\mathbf{x} + \delta_{\tilde{\mathbf{w}}}^*(\mathbf{x}, y)), y) - \nabla_{\mathbf{x}} \ell(h_{\tilde{\mathbf{w}}}(\mathbf{x} + \delta_{\tilde{\mathbf{w}}}^*(\mathbf{x}, y)), y) \right\| \\
&\stackrel{(a)}{\leq} \frac{\text{Lip}(\nabla_{\mathbf{x}} \ell \circ h_{\mathbf{w}})}{\lambda} \|\delta_{\mathbf{w}}^*(\mathbf{x}, y) - \delta_{\tilde{\mathbf{w}}}^*(\mathbf{x}, y)\| + \frac{L_{\mathbf{w}} \sum_{i=k}^L \prod_{j=0}^i \gamma_j \|W_j\|_2}{\lambda \|W_k\|_2} \|\Delta_k\|_2 \\
&\stackrel{(b)}{\leq} \frac{L_{\mathbf{w}} \sum_{i=0}^L \prod_{j=0}^i \gamma_j \|W_j\|_2}{\lambda} \|\delta_{\mathbf{w}}^*(\mathbf{x}, y) - \delta_{\tilde{\mathbf{w}}}^*(\mathbf{x}, y)\| + \frac{L_{\mathbf{w}} \sum_{i=k}^L \prod_{j=0}^i \gamma_j \|W_j\|_2}{\lambda \|W_k\|_2} \|\Delta_k\|_2 \\
&\stackrel{(c)}{\leq} (1 - \tau) \|\delta_{\mathbf{w}}^*(\mathbf{x}, y) - \delta_{\tilde{\mathbf{w}}}^*(\mathbf{x}, y)\| + \frac{L_{\mathbf{w}} \sum_{i=k}^L \prod_{j=0}^i \gamma_j \|W_j\|_2}{\lambda \|W_k\|_2} \|\Delta_k\|_2
\end{aligned}$$

Here, (a) follows from the definition of Lipschitz constant and Lemma 3's weight perturbation bound. (b) comes from a direct application of Lemma 1, and (c) follows from Theorem 1's assumption. Therefore, the above inequalities collectively lead to the following bound, which completes the proof:

$$\tau \|\delta_{\mathbf{w}}^*(\mathbf{x}, y) - \delta_{\tilde{\mathbf{w}}}^*(\mathbf{x}, y)\| \leq \frac{L_{\mathbf{w}} \sum_{i=k}^L \prod_{j=0}^i \gamma_j \|W_j\|_2}{\lambda \|W_k\|_2} \|\Delta_k\|_2.$$

$\square$

To prove Theorem 1, we follow a covering-number-based approach similar to the generalization analysis in [Bartlett et al., 2017] for the standard non-adversarial deep supervised learning problem. To do this, we consider the norm constraints  $\|W_i\|_2 \leq a'_i$ ,  $\|W_i\|_{2,1} \leq b'_i$  for every  $i = 0, \dots, L$ , and  $\|V_j\|_2 \leq a_j$ ,  $\|V_j\|_{2,1} \leq b_j$  for every  $j = 0, \dots, K$ . Now, we define the following covering resolution parameters for the classifier and substitute DNNs' different layers:

$$\epsilon'_k = \frac{\tau \lambda a'_k \alpha'_k \epsilon}{2 \left( \prod_{i=0}^K \xi_i a_i \right) \left( \prod_{i=0}^L \gamma_i a'_i \right) \left( \sum_{i=k}^L \prod_{j=0}^i \gamma_j a'_j \right)}, \text{ where } \alpha'_k = \frac{1}{A'} \frac{b'_k{}^{2/3}}{a'_k{}^{2/3}}, \quad A' = \sum_{i=0}^L \frac{b'_i{}^{2/3}}{a'_i{}^{2/3}}$$

$$\epsilon_j = \frac{a_j \alpha_j \epsilon}{2 \prod_{i=j}^K \gamma_i a_i}, \text{ where } \alpha_j = \frac{1}{A} \frac{b_j^{2/3}}{a_j^{2/3}}, A = \sum_{i=0}^K \frac{b_i^{2/3}}{a_i^{2/3}}.$$

Note that Lemma 4 implies that by finding an  $\epsilon'_k$ -covering for each  $W_k$  and  $\epsilon_j$ -covering for each  $V_j$ , the covering resolution for  $\mathcal{F} \circ \Delta_H|_S$  will be upper-bounded by

$$\sum_{k=0}^L \left[ \frac{L_{\mathbf{w}} L_{\mathbf{v}} \sum_{i=k}^L \prod_{j=0}^i \gamma_j \|W_j\|}{\tau \lambda \|W_k\|_2} \epsilon'_k \right] + \sum_{k=0}^K \left[ \frac{\prod_{i=k}^K \gamma_i \|V_i\|_2}{\|V_k\|_2} \epsilon_k \right] = \epsilon.$$

Therefore, by applying Lemma A.7 from [Bartlett et al., 2017] we will have the following bound on the  $\epsilon$ -covering-number for the set  $\mathcal{F} \circ \Delta_H|_S = \{\ell(f_{\mathbf{v}}(\mathbf{X} + \delta_{\mathbf{w}}^*(\mathbf{X}, Y))) : \forall 0 \leq i \leq K : \|V_i\|_2 \leq a_i, \|V_i\|_{2,1} \leq b_i, \forall 0 \leq j \leq L : \|W_j\|_2 \leq a'_j, \|W_j\|_{2,1} \leq b'_j\}$

$$\begin{aligned} & \log \mathcal{N}(\mathcal{F} \circ \Delta_H|_S, \|\cdot\|_2, \epsilon) \\ & \leq \sum_{i=0}^L \sup_{\mathbf{w}_{-i}, \mathbf{v} \in \mathcal{W}, \mathcal{V}} \left[ \log \mathcal{N}(\{\delta_{\mathbf{w}}^*(\mathbf{X}, Y) : \|\mathbf{W}_i\|_2 \leq a'_i, \|\mathbf{W}_i\|_{2,1} \leq b'_i\}, \|\cdot\|_2, \epsilon'_i) \right] \\ & \quad + \sum_{i=0}^K \sup_{\mathbf{w}, \mathbf{v}_{-i} \in \mathcal{W}, \mathcal{V}} \left[ \log \mathcal{N}(\{h_{\mathbf{v}_{0:i}}(\mathbf{X}), Y) : \|\mathbf{V}_i\|_2 \leq a_i, \|\mathbf{V}_i\|_{2,1} \leq b_i\}, \|\cdot\|_2, \epsilon_i) \right] \\ & \leq \sum_{i=0}^L \sup_{\mathbf{w}_{-i}, \mathbf{v} \in \mathcal{W}, \mathcal{V}} \left[ \log \mathcal{N}(\{\delta_{\mathbf{w}}^*(\mathbf{X}, Y) : \|\mathbf{W}_i\|_{2,1} \leq b'_i\}, \|\cdot\|_2, \epsilon'_i) \right] \\ & \quad + \sum_{i=0}^K \sup_{\mathbf{w}, \mathbf{v}_{-i} \in \mathcal{W}, \mathcal{V}} \left[ \log \mathcal{N}(\{h_{\mathbf{v}_{0:i}}(\mathbf{X}), Y) : \|\mathbf{V}_i\|_{2,1} \leq b_i\}, \|\cdot\|_2, \epsilon_i) \right] \\ & \leq \sum_{i=0}^L \left[ \sup_{\mathbf{w}_{-i}, \mathbf{v} \in \mathcal{W}, \mathcal{V}} \frac{b_i'^2 \|\delta_{\mathbf{w}}^*(\mathbf{X}, Y)\|_2^2}{\epsilon_i'^2} \log(2W^2) \right] \\ & \quad + \sum_{i=0}^L \left[ \sup_{\mathbf{w}, \mathbf{v}_{-i} \in \mathcal{W}, \mathcal{V}} \frac{b_i^2 \|h_{\mathbf{v}_{0:i}}(\mathbf{X})\|_2^2}{\epsilon_i^2} \log(2W^2) \right] \\ & \leq \sum_{i=0}^K \left[ \sup_{\mathbf{w}_{-i}, \mathbf{v} \in \mathcal{W}, \mathcal{V}} \frac{L_{\mathbf{w}}^2 \log(2W^2) b_i'^2}{\lambda^2 \epsilon^2 \epsilon_i'^2} \right] \\ & \quad + \sum_{i=0}^L \left[ \frac{4b_i^2 (B + \frac{\prod_{i=0}^L \gamma_i a_i'}{\lambda})^2 \prod_{i=0}^K \xi_i^2 a_i^2}{\epsilon^2} \sum_{i=0}^K \frac{b_i^2}{\alpha_i^2 a_i^2} \right] \\ & \leq \frac{\log(2W^2) \prod_{i=0}^L \gamma_i^2 a_i'^2}{\lambda^2 \epsilon^2} \sum_{k=0}^K \left[ \frac{b_i'^2 (\sum_{i=k}^L \prod_{j=0}^i \gamma_i a_i)^2}{\alpha_i'^2 a_i'^2} \right] \\ & \quad + \sum_{i=0}^L \left[ \frac{4b_i^2 (B + \frac{\prod_{i=0}^L \gamma_i a_i'}{\lambda})^2 \prod_{i=0}^K \xi_i^2 a_i^2}{\epsilon^2} \sum_{i=0}^K \frac{b_i^2}{\alpha_i^2 a_i^2} \right] \\ & \leq \frac{\log(2W^2) \prod_{i=0}^L \gamma_i^2 a_i'^2 (\sum_{i=0}^L \prod_{j=0}^i \gamma_j a_j)^2}{\lambda^2 \epsilon^2} \sum_{k=0}^K \left[ \frac{b_k'^2}{\alpha_k'^2 a_k'^2} \right] \\ & \quad + \sum_{i=0}^L \left[ \frac{4b_i^2 (B + \frac{\prod_{i=0}^L \gamma_i a_i'}{\lambda})^2 \prod_{j=0}^K \xi_j^2 a_j^2}{\epsilon^2} \sum_{k=0}^K \frac{b_k^2}{\alpha_k^2 a_k^2} \right] \\ & \leq \frac{4 \log(2W^2) \prod_{i=0}^L \gamma_i^2 a_i'^2 (\sum_{i=0}^L \prod_{j=0}^i \gamma_j a_j)^2}{\lambda^2 \epsilon^2} \sum_{i=0}^L \left[ \frac{b_i'^2}{\alpha_i'^2 a_i'^2} \right] \\ & \quad + \frac{4 \log(2W^2) (B + \frac{\prod_{i=0}^L \gamma_i a_i'}{\lambda})^2 \prod_{i=0}^K \xi_i^2 a_i^2}{\epsilon^2} \sum_{i=0}^K \left[ \frac{b_i^2}{\alpha_i^2 a_i^2} \right] \end{aligned}$$

$$= \frac{C}{\epsilon^2}$$

where we define

$$C := 4 \log(2W^2) \left[ \frac{\prod_{i=0}^L \gamma_i^2 a_i'^2 (\sum_{i=0}^L \prod_{j=0}^i \gamma_j a_j)^2}{\lambda^2} \left[ \sum_{i=0}^L \frac{b_i'^{2/3}}{a_i'^{2/3}} \right]^3 \right. \\ \left. + \left( B + \frac{\prod_{i=0}^L \gamma_i a_i'}{\lambda} \right)^2 \prod_{i=0}^K \xi_i^2 a_i^2 \left[ \sum_{i=0}^K \frac{b_i^{2/3}}{a_i^{2/3}} \right]^3 \right].$$

Now, based on the above covering-number bound, we use the Dudley entropy integral bound [Bartlett et al., 2017] which bounds the empirical Rademacher complexity of  $\mathcal{F} \circ \Delta_{\mathcal{H}|S}$  as

$$\mathcal{R}(\mathcal{F} \circ \Delta_{\mathcal{H}|S}) \leq \inf_{\alpha \geq 0} \left\{ \frac{4\alpha}{\sqrt{n}} + \frac{12}{n} \int_{\alpha}^{\sqrt{n}} \sqrt{\log \mathcal{N}(\mathcal{F} \circ \Delta_{\mathcal{H}|S}, \|\cdot\|_2, \epsilon)} d\epsilon \right\} \\ \leq \inf_{\alpha \geq 0} \left\{ \frac{4\alpha}{\sqrt{n}} + \frac{12\sqrt{C}}{n} \log\left(\frac{\sqrt{n}}{\alpha}\right) \right\} \\ \leq \frac{4}{n^{3/2}} + \frac{18 \log(n) \sqrt{C}}{n}$$

where the last line follows from choosing  $\alpha = 1/n$ . Also, note that since for every non-negative constants  $a, b \geq 0$  we have  $\sqrt{a+b} \leq \sqrt{a} + \sqrt{b}$ , then

$$\sqrt{C} \leq 2\sqrt{\log(2D^2)} \left[ \frac{\prod_{i=0}^L \gamma_i a_i' (\sum_{i=0}^L \prod_{j=0}^i \gamma_j a_j)}{\lambda} \left[ \sum_{i=0}^L \frac{b_i'^{2/3}}{a_i'^{2/3}} \right]^{3/2} \right. \\ \left. + \left( B + \frac{\prod_{i=0}^L \gamma_i a_i'}{\lambda} \right) \prod_{i=0}^K \xi_i a_i \left[ \sum_{i=0}^K \frac{b_i^{2/3}}{a_i^{2/3}} \right]^{3/2} \right].$$

Consequently, we have the following bound where  $R_{\mathcal{V}}$  and  $R_{\mathcal{W}}$  are defined as in Theorem 1:

$$\mathcal{R}(\mathcal{F} \circ \Delta_{\mathcal{H}|S}) \leq \mathcal{O}\left( \frac{(B + \frac{L\mathbf{w}}{\lambda})(R_{\mathcal{V}} + \frac{1}{\tau^2} L_{\mathbf{w}} R_{\mathcal{W}}) \log(n)}{n} \log(D) \right)$$

Therefore, according to standard Rademacher complexity-based generalization bounds [Bartlett and Mendelson, 2002], for every  $\omega > 0$  with probability at least  $1 - \omega$  we have for every  $\mathbf{v}, \mathbf{w} \in \mathcal{V}, \mathcal{W}$ :

$$\frac{1}{n} \sum_{i=1}^n \left[ \ell(f_{\mathbf{v}}(\mathbf{x}_i + \delta_{\mathbf{w}}^*(\mathbf{x}_i, y_i)), y_i) \right] - \mathbb{E} \left[ \ell(f_{\mathbf{v}}(\mathbf{X} + \delta_{\mathbf{w}}^*(\mathbf{X}, Y)), Y) \right] \\ \leq \mathcal{O}\left( c\sqrt{\frac{\log(1/\omega)}{n}} + \frac{(B + \frac{L\mathbf{w}}{\lambda})(R_{\mathcal{V}} + \frac{1}{\tau^2} L_{\mathbf{w}} R_{\mathcal{W}}) \log(n)}{n} \log(D) \right),$$

which implies that

$$\epsilon_{\text{gen}}(\delta_{\mathbf{w}}^*) = \min_{\mathbf{v} \in \mathcal{V}} \left\{ \frac{1}{n} \sum_{i=1}^n \left[ \ell(f_{\mathbf{v}}(\mathbf{x}_i + \delta_{\mathbf{w}}^*(\mathbf{x}_i, y_i)), y_i) \right] \right\} - \min_{\mathbf{v} \in \mathcal{V}} \left\{ \mathbb{E} \left[ \ell(f_{\mathbf{v}}(\mathbf{X} + \delta_{\mathbf{w}}^*(\mathbf{X}, Y)), Y) \right] \right\} \\ \leq \max_{\mathbf{v} \in \mathcal{V}} \left\{ \frac{1}{n} \sum_{i=1}^n \left[ \ell(f_{\mathbf{v}}(\mathbf{x}_i + \delta_{\mathbf{w}}^*(\mathbf{x}_i, y_i)), y_i) \right] - \mathbb{E} \left[ \ell(f_{\mathbf{v}}(\mathbf{X} + \delta_{\mathbf{w}}^*(\mathbf{X}, Y)), Y) \right] \right\} \\ \leq \mathcal{O}\left( c\sqrt{\frac{\log(1/\omega)}{n}} + \frac{(B + \frac{L\mathbf{w}}{\lambda})(R_{\mathcal{V}} + \frac{1}{\tau^2} L_{\mathbf{w}} R_{\mathcal{W}}) \log(n)}{n} \log(D) \right).$$

Therefore, the theorem's proof is complete.

## B ADDITIONAL NUMERICAL EXPERIMENTS

In this section, we report the complete set of our numerical results. Table 1 shows the complete results for DNNs regularized by early stopping, i.e. the complete version of Table ???. Moreover, Tables 2,3,4 are the full versions of Table ??, demonstrating the relationship between generalization errors and transferability rates of the discussed datasets and DNN architectures. In addition to our earlier results, the accuracies for adversarially-perturbed training and test samples are also included in the tables.

In addition to the previous results, we also present the transferability rates averaged over test samples whose adversarial examples are predicted correctly by both the regularized and unregularized substitute DNNs. The transferability rates over those test samples intersecting the correctly predicted samples by regularized and unregularized substitute DNNs are shown in Tables 5 and 6 under the title Transferability Rate-Int. Our numerical results suggest that over the test samples correctly predicted by both regularized and unregularized DNNs, a better generalization score again results in higher transferability rates for designed adversarial examples.

Last, Tables 7 and 8 show the numerical results when substitute model and target are trained with the same training set.

Table 1: Generalization and transferability rates for different DNN architectures and image datasets with and without early stopping (ES)

| Dataset  | Model     | Method | Train Acc | Test Acc | Gen.Err. | Transferability Rate(VGG16) | Transferability Rate(ResNet18) |
|----------|-----------|--------|-----------|----------|----------|-----------------------------|--------------------------------|
| Cifar10  | Inception | PGM    | 0.970     | 0.453    | 0.517    | 0.127                       | 0.104                          |
|          |           | PGM-ES | 0.591     | 0.518    | 0.073    | 0.198                       | 0.172                          |
|          |           | FGM    | 0.997     | 0.529    | 0.467    | 0.100                       | 0.089                          |
|          |           | FGM-ES | 0.657     | 0.530    | 0.126    | 0.170                       | 0.147                          |
|          | Alexnet   | PGM    | 1.000     | 0.421    | 0.579    | 0.098                       | 0.077                          |
|          |           | PGM-ES | 0.548     | 0.487    | 0.061    | 0.154                       | 0.136                          |
|          |           | FGM    | 1.000     | 0.480    | 0.520    | 0.100                       | 0.087                          |
|          |           | FGM-ES | 0.594     | 0.501    | 0.092    | 0.152                       | 0.127                          |
| Cifar100 | Inception | PGM    | 0.877     | 0.231    | 0.646    | 0.283                       | 0.258                          |
|          |           | PGM-ES | 0.408     | 0.271    | 0.137    | 0.330                       | 0.286                          |
|          |           | FGM    | 0.984     | 0.272    | 0.711    | 0.270                       | 0.239                          |
|          |           | FGM-ES | 0.457     | 0.312    | 0.146    | 0.327                       | 0.289                          |
|          | Alexnet   | PGM    | 0.966     | 0.202    | 0.764    | 0.252                       | 0.227                          |
|          |           | PGM-ES | 0.338     | 0.248    | 0.091    | 0.294                       | 0.266                          |
|          |           | FGM    | 0.990     | 0.234    | 0.756    | 0.261                       | 0.232                          |
|          |           | FGM-ES | 0.399     | 0.278    | 0.122    | 0.291                       | 0.259                          |
| SVHN     | Inception | PGM    | 0.925     | 0.585    | 0.341    | 0.207                       | 0.220                          |
|          |           | PGM-ES | 0.711     | 0.654    | 0.057    | 0.298                       | 0.322                          |
|          |           | FGM    | 0.998     | 0.619    | 0.380    | 0.136                       | 0.129                          |
|          |           | FGM-ES | 0.898     | 0.718    | 0.180    | 0.213                       | 0.219                          |
|          | Alexnet   | PGM    | 0.848     | 0.541    | 0.307    | 0.211                       | 0.228                          |
|          |           | PGM-ES | 0.624     | 0.594    | 0.030    | 0.256                       | 0.278                          |
|          |           | FGM    | 0.949     | 0.576    | 0.373    | 0.157                       | 0.170                          |
|          |           | FGM-ES | 0.691     | 0.627    | 0.064    | 0.241                       | 0.260                          |

## References

- Peter L Bartlett and Shahar Mendelson. Rademacher and gaussian complexities: Risk bounds and structural results. *Journal of Machine Learning Research*, 3(Nov):463–482, 2002.
- Peter L Bartlett, Dylan J Foster, and Matus J Telgarsky. Spectrally-normalized margin bounds for neural networks. In *Advances in Neural Information Processing Systems*, pages 6240–6249, 2017.
- Farzan Farnia, Jesse M Zhang, and David Tse. Generalizable adversarial training via spectral normalization. *arXiv preprint arXiv:1811.07457*, 2018.

Table 2: Generalization and transferability rates on CIFAR-10 data, with and without using spectral regularization

| Dataset           | Model     | Method            | $\beta$  | Train Acc | Test Acc | Gen.Err. | Transferability Rate(VGG16) | Transferability Rate(ResNet18) |
|-------------------|-----------|-------------------|----------|-----------|----------|----------|-----------------------------|--------------------------------|
| Cifar10           | Inception | FGM( $L_2$ )      | $\infty$ | 0.998     | 0.532    | 0.466    | 0.092                       | 0.078                          |
|                   |           |                   | 1        | 0.830     | 0.511    | 0.320    | 0.136                       | 0.113                          |
|                   |           |                   | 1.3      | 0.936     | 0.479    | 0.456    | 0.124                       | 0.097                          |
|                   |           |                   | 1.6      | 0.997     | 0.509    | 0.488    | 0.099                       | 0.084                          |
|                   |           |                   | 2        | 0.999     | 0.541    | 0.458    | 0.087                       | 0.073                          |
|                   |           |                   | 3        | 1.000     | 0.554    | 0.445    | 0.090                       | 0.077                          |
|                   |           | PGM( $L_2$ )      | $\infty$ | 0.951     | 0.443    | 0.508    | 0.104                       | 0.084                          |
|                   |           |                   | 1        | 0.759     | 0.502    | 0.258    | 0.150                       | 0.134                          |
|                   |           |                   | 1.3      | 0.913     | 0.459    | 0.454    | 0.125                       | 0.099                          |
|                   |           |                   | 1.6      | 0.945     | 0.447    | 0.499    | 0.115                       | 0.095                          |
|                   |           |                   | 2        | 0.979     | 0.451    | 0.529    | 0.110                       | 0.092                          |
|                   |           |                   | 3        | 0.988     | 0.468    | 0.520    | 0.103                       | 0.082                          |
|                   |           | FGM( $L_\infty$ ) | $\infty$ | 0.946     | 0.442    | 0.504    | 0.124                       | 0.101                          |
|                   |           |                   | 1        | 0.694     | 0.451    | 0.243    | 0.191                       | 0.153                          |
|                   |           |                   | 1.3      | 0.842     | 0.421    | 0.421    | 0.165                       | 0.129                          |
|                   |           |                   | 1.6      | 0.951     | 0.419    | 0.531    | 0.129                       | 0.106                          |
|                   |           |                   | 2        | 0.980     | 0.453    | 0.527    | 0.121                       | 0.103                          |
|                   |           |                   | 3        | 0.988     | 0.470    | 0.517    | 0.112                       | 0.091                          |
|                   |           | PGM( $L_\infty$ ) | $\infty$ | 0.708     | 0.525    | 0.184    | 0.419                       | 0.393                          |
|                   |           |                   | 1        | 0.627     | 0.545    | 0.082    | 0.497                       | 0.474                          |
|                   |           |                   | 1.3      | 0.674     | 0.534    | 0.140    | 0.466                       | 0.443                          |
|                   |           |                   | 1.6      | 0.710     | 0.520    | 0.190    | 0.442                       | 0.422                          |
|                   |           |                   | 2        | 0.739     | 0.505    | 0.234    | 0.408                       | 0.389                          |
|                   |           |                   | 3        | 0.745     | 0.504    | 0.241    | 0.398                       | 0.380                          |
|                   | Alexnet   | FGM( $L_2$ )      | $\infty$ | 1.000     | 0.495    | 0.505    | 0.089                       | 0.070                          |
|                   |           |                   | 1        | 0.977     | 0.526    | 0.451    | 0.147                       | 0.122                          |
|                   |           |                   | 1.3      | 1.000     | 0.496    | 0.504    | 0.132                       | 0.105                          |
|                   |           |                   | 1.6      | 1.000     | 0.474    | 0.526    | 0.115                       | 0.090                          |
|                   |           |                   | 2        | 1.000     | 0.477    | 0.523    | 0.108                       | 0.088                          |
|                   |           |                   | 3        | 1.000     | 0.496    | 0.504    | 0.098                       | 0.079                          |
|                   |           | PGM( $L_2$ )      | $\infty$ | 0.999     | 0.454    | 0.545    | 0.105                       | 0.087                          |
|                   |           |                   | 1        | 0.861     | 0.519    | 0.342    | 0.162                       | 0.139                          |
|                   |           | FGM( $L_\infty$ ) | $\infty$ | 0.996     | 0.400    | 0.596    | 0.102                       | 0.089                          |
|                   |           |                   | 1        | 0.914     | 0.426    | 0.487    | 0.199                       | 0.169                          |
|                   |           |                   | 1.3      | 0.998     | 0.387    | 0.610    | 0.169                       | 0.142                          |
|                   |           |                   | 1.6      | 1.000     | 0.368    | 0.632    | 0.146                       | 0.120                          |
| 2                 |           |                   | 1.000    | 0.420     | 0.580    | 0.128    | 0.106                       |                                |
| 3                 |           |                   | 1.000    | 0.435     | 0.565    | 0.115    | 0.096                       |                                |
| PGM( $L_\infty$ ) |           | $\infty$          | 0.685    | 0.474     | 0.211    | 0.446    | 0.423                       |                                |
|                   |           | 1                 | 0.628    | 0.473     | 0.156    | 0.472    | 0.457                       |                                |
|                   |           | 1.3               | 0.680    | 0.436     | 0.245    | 0.441    | 0.423                       |                                |
|                   |           | 1.6               | 0.697    | 0.420     | 0.277    | 0.421    | 0.403                       |                                |
|                   | 2         | 0.679             | 0.408    | 0.271     | 0.404    | 0.388    |                             |                                |
|                   | 3         | 0.628             | 0.439    | 0.189     | 0.426    | 0.405    |                             |                                |

Table 3: Generalization and transferability rates on CIFAR-100 dataset, with and without spectral regularization.

| Dataset      | Model     | Method       | $\beta$  | Train Acc | Test Acc | Gen.Err. | Transferability Rate(VGG16) | Transferability Rate(ResNet18) |
|--------------|-----------|--------------|----------|-----------|----------|----------|-----------------------------|--------------------------------|
| Cifar100     | Inception | FGM( $L_2$ ) | $\infty$ | 0.996     | 0.279    | 0.717    | 0.268                       | 0.236                          |
|              |           |              | 1        | 0.761     | 0.277    | 0.484    | 0.250                       | 0.290                          |
|              |           |              | 1.3      | 0.853     | 0.294    | 0.558    | 0.313                       | 0.275                          |
|              |           |              | 1.6      | 0.998     | 0.260    | 0.738    | 0.236                       | 0.263                          |
|              |           |              | 2        | 1.000     | 0.284    | 0.715    | 0.238                       | 0.272                          |
|              |           |              | 3        | 0.999     | 0.262    | 0.736    | 0.221                       | 0.257                          |
|              |           | PGM( $L_2$ ) | $\infty$ | 0.857     | 0.255    | 0.602    | 0.303                       | 0.270                          |
|              | 1.3       | 0.750        | 0.256    | 0.494     | 0.330    | 0.301    |                             |                                |
|              | Alexnet   | FGM( $L_2$ ) | $\infty$ | 1.000     | 0.242    | 0.758    | 0.258                       | 0.232                          |
|              |           |              | 1        | 0.925     | 0.315    | 0.611    | 0.342                       | 0.310                          |
|              |           |              | 1.3      | 1.000     | 0.289    | 0.710    | 0.304                       | 0.266                          |
|              |           |              | 1.6      | 1.000     | 0.285    | 0.715    | 0.291                       | 0.248                          |
|              |           |              | 2        | 1.000     | 0.284    | 0.716    | 0.288                       | 0.253                          |
|              |           |              | 3        | 1.000     | 0.269    | 0.730    | 0.265                       | 0.240                          |
| PGM( $L_2$ ) |           | $\infty$     | 1.000    | 0.210     | 0.789    | 0.229    | 0.260                       |                                |
| 1            | 0.889     | 0.288        | 0.601    | 0.323     | 0.353    |          |                             |                                |

Table 4: Generalization and transferability rates on SVHN dataset, with and without spectral regularization.

| Dataset      | Model     | Method       | $\beta$  | Train Acc | Test Acc | Gen.Err. | Transferability Rate(VGG16) | Transferability Rate(ResNet18) |
|--------------|-----------|--------------|----------|-----------|----------|----------|-----------------------------|--------------------------------|
| SVHN         | Inception | FGM( $L_2$ ) | $\infty$ | 0.991     | 0.618    | 0.373    | 0.134                       | 0.126                          |
|              |           |              | 1        | 0.848     | 0.645    | 0.203    | 0.277                       | 0.257                          |
|              |           |              | 1.3      | 0.967     | 0.605    | 0.362    | 0.223                       | 0.209                          |
|              |           |              | 1.6      | 0.998     | 0.573    | 0.426    | 0.202                       | 0.187                          |
|              |           |              | 2        | 1.000     | 0.571    | 0.429    | 0.158                       | 0.149                          |
|              |           |              | 3        | 1.000     | 0.642    | 0.358    | 0.121                       | 0.118                          |
|              |           | PGM( $L_2$ ) | $\infty$ | 0.934     | 0.592    | 0.342    | 0.193                       | 0.177                          |
|              | 1         | 0.767        | 0.652    | 0.115     | 0.339    | 0.313    |                             |                                |
|              | Alexnet   | FGM( $L_2$ ) | $\infty$ | 0.991     | 0.618    | 0.373    | 0.134                       | 0.126                          |
|              |           |              | 1        | 0.848     | 0.645    | 0.203    | 0.277                       | 0.257                          |
|              |           |              | 1.3      | 0.967     | 0.605    | 0.362    | 0.223                       | 0.209                          |
|              |           |              | 1.6      | 0.998     | 0.573    | 0.426    | 0.202                       | 0.187                          |
|              |           |              | 2        | 1.000     | 0.571    | 0.429    | 0.158                       | 0.149                          |
|              |           |              | 3        | 0.999     | 0.581    | 0.418    | 0.145                       | 0.133                          |
| PGM( $L_2$ ) |           | $\infty$     | 0.844    | 0.546     | 0.298    | 0.211    | 0.225                       |                                |
| 1            | 0.817     | 0.618        | 0.199    | 0.276     | 0.292    |          |                             |                                |



Table 5: Generalization and transferability rates for different DNN architectures and image datasets with and without spectral regularization. Transferability Rate-Int. means averaged transferability rate on adversarial examples correctly labeled by both the regularized and unregularized DNNs.

| Dataset           | Model     | Method            | $\beta$  | Gen.Err. | Transferability Rate-Int(VGG16) | Transferability Rate-Int(ResNet18) |
|-------------------|-----------|-------------------|----------|----------|---------------------------------|------------------------------------|
| Cifar10           | Inception | FGM( $L_2$ )      | $\infty$ | 0.466    | 0.032                           | 0.026                              |
|                   |           |                   | 1        | 0.320    | 0.077                           | 0.058                              |
|                   |           | PGM( $L_2$ )      | $\infty$ | 0.508    | 0.030                           | 0.026                              |
|                   |           |                   | 1        | 0.258    | 0.063                           | 0.052                              |
|                   |           | FGM( $L_\infty$ ) | $\infty$ | 0.504    | 0.029                           | 0.028                              |
|                   |           |                   | 1        | 0.243    | 0.070                           | 0.090                              |
|                   |           | PGM( $L_\infty$ ) | $\infty$ | 0.184    | 0.136                           | 0.181                              |
|                   |           |                   | 1        | 0.082    | 0.182                           | 0.162                              |
|                   | Alexnet   | FGM( $L_2$ )      | $\infty$ | 0.505    | 0.035                           | 0.029                              |
|                   |           |                   | 1        | 0.451    | 0.076                           | 0.068                              |
|                   |           | PGM( $L_2$ )      | $\infty$ | 0.545    | 0.037                           | 0.030                              |
|                   |           |                   | 1        | 0.342    | 0.077                           | 0.063                              |
| FGM( $L_\infty$ ) |           | $\infty$          | 0.596    | 0.039    | 0.019                           |                                    |
|                   |           | 1                 | 0.487    | 0.089    | 0.070                           |                                    |
| PGM( $L_\infty$ ) |           | $\infty$          | 0.211    | 0.227    | 0.222                           |                                    |
|                   |           | 1                 | 0.156    | 0.271    | 0.248                           |                                    |
| Cifar100          | Inception | FGM( $L_2$ )      | $\infty$ | 0.717    | 0.126                           | 0.112                              |
|                   |           |                   | 1.3      | 0.558    | 0.154                           | 0.131                              |
|                   |           | PGM( $L_2$ )      | $\infty$ | 0.602    | 0.141                           | 0.123                              |
|                   |           |                   | 1.3      | 0.494    | 0.160                           | 0.141                              |
|                   | Alexnet   | FGM( $L_2$ )      | $\infty$ | 0.758    | 0.127                           | 0.101                              |
|                   |           |                   | 1        | 0.611    | 0.180                           | 0.159                              |
|                   |           | PGM( $L_2$ )      | $\infty$ | 0.789    | 0.114                           | 0.108                              |
|                   |           |                   | 1        | 0.601    | 0.159                           | 0.151                              |
| SVHN              | Inception | FGM( $L_2$ )      | $\infty$ | 0.373    | 0.010                           | 0.013                              |
|                   |           |                   | 1        | 0.203    | 0.103                           | 0.125                              |
|                   |           | PGM( $L_2$ )      | $\infty$ | 0.342    | 0.024                           | 0.031                              |
|                   |           |                   | 1        | 0.115    | 0.102                           | 0.125                              |
|                   | Alexnet   | FGM( $L_2$ )      | $\infty$ | 0.373    | 0.013                           | 0.014                              |
|                   |           |                   | 1        | 0.203    | 0.092                           | 0.112                              |
|                   |           | PGM( $L_2$ )      | $\infty$ | 0.298    | 0.044                           | 0.053                              |
|                   |           |                   | 1        | 0.199    | 0.080                           | 0.101                              |

Table 6: Generalization and transferability rates for different DNN architectures and image datasets with and without early stopping (ES), Transferability Rate-Int. means averaged transferability rate on adversarial examples correctly labeled by both the regularized and unregularized DNNs.

| Dataset  | Model     | Method | Gen.Err. | Transferability Rate-Int.(VGG16) | Transferability Rate-Int.(ResNet18) |
|----------|-----------|--------|----------|----------------------------------|-------------------------------------|
| Cifar10  | Inception | PGM    | 0.517    | 0.030                            | 0.127                               |
|          |           | PGM-ES | 0.073    | 0.063                            | 0.198                               |
|          |           | FGM    | 0.467    | 0.032                            | 0.100                               |
|          |           | FGM-ES | 0.126    | 0.077                            | 0.170                               |
|          | Alexnet   | PGM    | 0.579    | 0.037                            | 0.098                               |
|          |           | PGM-ES | 0.061    | 0.077                            | 0.154                               |
|          |           | FGM    | 0.520    | 0.035                            | 0.100                               |
|          |           | FGM-ES | 0.092    | 0.076                            | 0.152                               |
| Cifar100 | Inception | PGM    | 0.646    | 0.141                            | 0.283                               |
|          |           | PGM-ES | 0.137    | 0.160                            | 0.330                               |
|          |           | FGM    | 0.711    | 0.126                            | 0.270                               |
|          |           | FGM-ES | 0.146    | 0.154                            | 0.327                               |
|          | Alexnet   | PGM    | 0.764    | 0.114                            | 0.252                               |
|          |           | PGM-ES | 0.091    | 0.159                            | 0.294                               |
|          |           | FGM    | 0.756    | 0.127                            | 0.261                               |
|          |           | FGM-ES | 0.122    | 0.180                            | 0.291                               |
| SVHN     | Inception | PGM    | 0.341    | 0.024                            | 0.207                               |
|          |           | PGM-ES | 0.057    | 0.102                            | 0.298                               |
|          |           | FGM    | 0.380    | 0.010                            | 0.136                               |
|          |           | FGM-ES | 0.180    | 0.103                            | 0.213                               |
|          | Alexnet   | PGM    | 0.307    | 0.044                            | 0.211                               |
|          |           | PGM-ES | 0.030    | 0.080                            | 0.256                               |
|          |           | FGM    | 0.373    | 0.013                            | 0.157                               |
|          |           | FGM-ES | 0.064    | 0.092                            | 0.241                               |

Table 7: Generalization error and transferability rates when the target and substitute models are trained using the same training set, with and without spectral normalization.

| Dataset  | Model     | Method       | $\beta$  | Train Acc | Test Acc | Gen. Err. | Transferability Rate (VGG16) | Transferability Rate (R18) |
|----------|-----------|--------------|----------|-----------|----------|-----------|------------------------------|----------------------------|
| Cifar10  | Inception | FGM( $L_2$ ) | $\infty$ | 0.983     | 0.563    | 0.420     | 0.995                        | 0.108                      |
|          |           |              | 1        | 0.801     | 0.565    | 0.236     | 0.176                        | 0.174                      |
|          |           | PGM( $L_2$ ) | $\infty$ | 0.896     | 0.498    | 0.398     | 0.129                        | 0.134                      |
|          |           |              | 1        | 0.757     | 0.544    | 0.213     | 0.183                        | 0.183                      |
| Cifar100 | Inception | FGM( $L_2$ ) | $\infty$ | 0.822     | 0.281    | 0.541     | 0.211                        | 0.213                      |
|          |           |              | 1.3      | 0.619     | 0.309    | 0.310     | 0.253                        | 0.254                      |
|          |           | PGM( $L_2$ ) | $\infty$ | 0.669     | 0.292    | 0.377     | 0.253                        | 0.254                      |
|          |           |              | 1.3      | 0.559     | 0.310    | 0.249     | 0.285                        | 0.286                      |
| SVHN     | Alexnet   | FGM( $L_2$ ) | $\infty$ | 0.901     | 0.629    | 0.272     | 0.160                        | 0.164                      |
|          |           |              | 1        | 0.813     | 0.667    | 0.146     | 0.262                        | 0.267                      |
|          |           | PGM( $L_2$ ) | $\infty$ | 0.792     | 0.578    | 0.214     | 0.234                        | 0.235                      |
|          |           |              | 1        | 0.775     | 0.637    | 0.139     | 0.281                        | 0.286                      |

Table 8: Generalization error and transferability rates when the target and substitute models are trained using the same training set, with and without early stopping.

| Dataset  | Model     | Attack          | Train Acc | Test Acc | Gen. Err. | Transferability Rate (VGG16) | Transferability Rate (R18) |
|----------|-----------|-----------------|-----------|----------|-----------|------------------------------|----------------------------|
| Cifar10  | Inception | FGM( $L_2$ )    | 0.984     | 0.553    | 0.431     | 0.010                        | 0.108                      |
|          |           | FGM( $L_2$ )-ES | 0.622     | 0.583    | 0.039     | 0.139                        | 0.143                      |
|          | Alexnet   | FGM( $L_2$ )    | 1.000     | 0.525    | 0.475     | 0.084                        | 0.094                      |
|          |           | FGM( $L_2$ )-ES | 0.667     | 0.548    | 0.119     | 0.132                        | 0.137                      |
| Cifar100 | Inception | FGM( $L_2$ )    | 0.939     | 0.290    | 0.649     | 0.224                        | 0.263                      |
|          |           | FGM( $L_2$ )-ES | 0.429     | 0.340    | 0.088     | 0.261                        | 0.315                      |
|          | Alexnet   | FGM( $L_2$ )    | 0.912     | 0.248    | 0.664     | 0.246                        | 0.271                      |
|          |           | FGM( $L_2$ )-ES | 0.338     | 0.307    | 0.032     | 0.283                        | 0.306                      |
| SVHN     | Inception | FGM( $L_2$ )    | 0.997     | 0.621    | 0.376     | 0.130                        | 0.136                      |
|          |           | FGM( $L_2$ )-ES | 0.883     | 0.667    | 0.216     | 0.226                        | 0.224                      |
|          | Alexnet   | FGM( $L_2$ )    | 0.948     | 0.578    | 0.370     | 0.171                        | 0.160                      |
|          |           | FGM( $L_2$ )-ES | 0.685     | 0.628    | 0.057     | 0.250                        | 0.253                      |

Table 9: Transferability rates when adversarial examples are generated by different methods and from different substitute models.

| substitute DNN        | regularization method of DNN | target DNN        | Transferability Rate of FGM | Transferability Rate of I-FGSM | Transferability Rate of PGD |
|-----------------------|------------------------------|-------------------|-----------------------------|--------------------------------|-----------------------------|
| PGD-trained Inception | spectral normalization       | ERM-trained VGG16 | 0.134                       | 0.148                          | 0.151                       |
|                       | early stop                   |                   | 0.172                       | 0.177                          | 0.198                       |
|                       | None                         |                   | 0.092                       | 0.097                          | 0.106                       |
| ERM-trained Inception | spectral normalization       | ERM-trained VGG16 | 0.071                       | 0.070                          | 0.062                       |
|                       | early stop                   |                   | 0.088                       | 0.099                          | 0.113                       |
|                       | None                         |                   | 0.030                       | 0.044                          | 0.024                       |
